# Supplementary material for: Copolymerization of ethylene with norbornene or 1-octene using supported ionic liquid systems
Source: Springer Nature journal article supplement (doi:10.1007/s00289-016-1866-1), 2016-11-30
Supplement: MOESM1 [file 11652312]

**Total norbornene incorporation** in polymer was calculated using equation:

$$\text{Mol NB\%} = [1/3(2I_{C7} + I_{C1/C4} + I_{C2/C3})/I_{CH2}] \times 100\%$$

where:  $I_{CH2}$ ,  $I_{C7}$ ,  $I_{C1/C4}$ ,  $I_{C2/C3}$  are total area of the  $^{13}C$  NMR signal at 26-30, 30-36, 36-42 and 43-52 ppm.

For example, total areas of the signal assigned to the selected carbon atoms for copolymer with 35.3 mol% NB incorporation (Table 1, item 20) were:

| Carbon atoms | CH2  | C7   | C1/C4 | C2/C3 |
|--------------|------|------|-------|-------|
| Total area   | 3.18 | 0.71 | 0.95  | 1.00  |

For all the calculations, total area of the signal assigned to the C2/C3 carbon atoms was taken as unit value. Thus:

$$\text{Mol NB\%} = 1/3[2 \times 0.71 + 0.95 + 1]/3.18 \times 100\% = 35.3\%$$

**Total 1-octene incorporation** in polymer was calculated using total areas of the signal assigned to the selected carbon atoms according to equation:

$$\text{Mol Oct\%} = O' / (O' + E') \times 100\%$$

where: CH (br) branches  $O1 = (A + 2C + 2D)/2$ ;  $\alpha$ -carbons  $O2 = [1.5A + 2B + (D + E) - D]/3$ ; average moles 1-octene  $O' = (O1 + O2)/2$ ; moles ethylene  $E' = \{[(F + G + H) - (3A + 3B + H + J + I)]/2\} + O'$ ,

where the regions of  $^{13}C$  NMR signals are: A (40.8-39.8 ppm), B (39.8-38.8 ppm), C (38.8-36.3 ppm), D (34.0-33.8 ppm), D+E (36.1-32.5 ppm), F+G+H (32.5-24.8 ppm), H (27.8-25.8 ppm), I (24.3-23.3 ppm), and J (23.3-21.3 ppm).

For example, total areas of the signal assigned to the selected regions for copolymer with 6.9 mol% 1-octene incorporation (Table 2, item 8) were:

| Region (ppm) | A (40.8-39.8) | B (39.8-38.8) | C (38.8-36.3) | D (34.0-33.8) | D+E (36.1-32.5) | F+G+H (32.5-24.8) | H (27.8-25.8) | I (24.3-23.3) | J (23.3-21.3) |
|--------------|---------------|---------------|---------------|---------------|-----------------|-------------------|---------------|---------------|---------------|
| Total area   | 0.41          | 0.30          | 1.27          | 2.08          | 4.19            | 65.00             | 2.92          | 0.48          | 1.00          |

For all the calculations, *J* area was taken as unit value. Thus:

$$O1 = (0.41 + 2 \times 1.27 + 2 \times 2.08) = 3.55$$

$$O2 = [1.5 \times 0.41 + 2 \times 0.30 + 4.19 - 2.08]/3 = 1.11$$

$$O' = (3.55 + 1.11)/2 = 2.33$$

$$E' = [65.00 - (3 \times 0.41 + 3 \times 0.30 + 2.92 + 0.48 + 1.00)]/2 + 2.33 = 31.57$$

Thus:

$$\text{Mol Oct\%} = 2.33 / (2.33 + 31.57) \times 100\% = 6.9\%$$

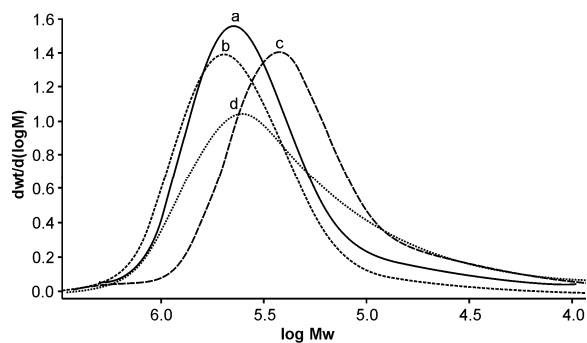

**Fig 1S.** GPC traces of the copolymer samples: a, b) ethylene/norbornene (Table 1, items 17, 18, NB incorporation 18.6, 24.3mol%); c, d) ethylene/1-octene (Table 2, items 5, 8, Oct. incorporation 4.9, 6.9mol%).

**Fig. 2S**  $^{13}\text{C}$  NMR spectra of the ethylene/norbornene copolymer obtained using the SIL/ $\text{Cp}_2\text{VCl}_2$  catalyst, initial norbornene concentration – 1 mol/L.

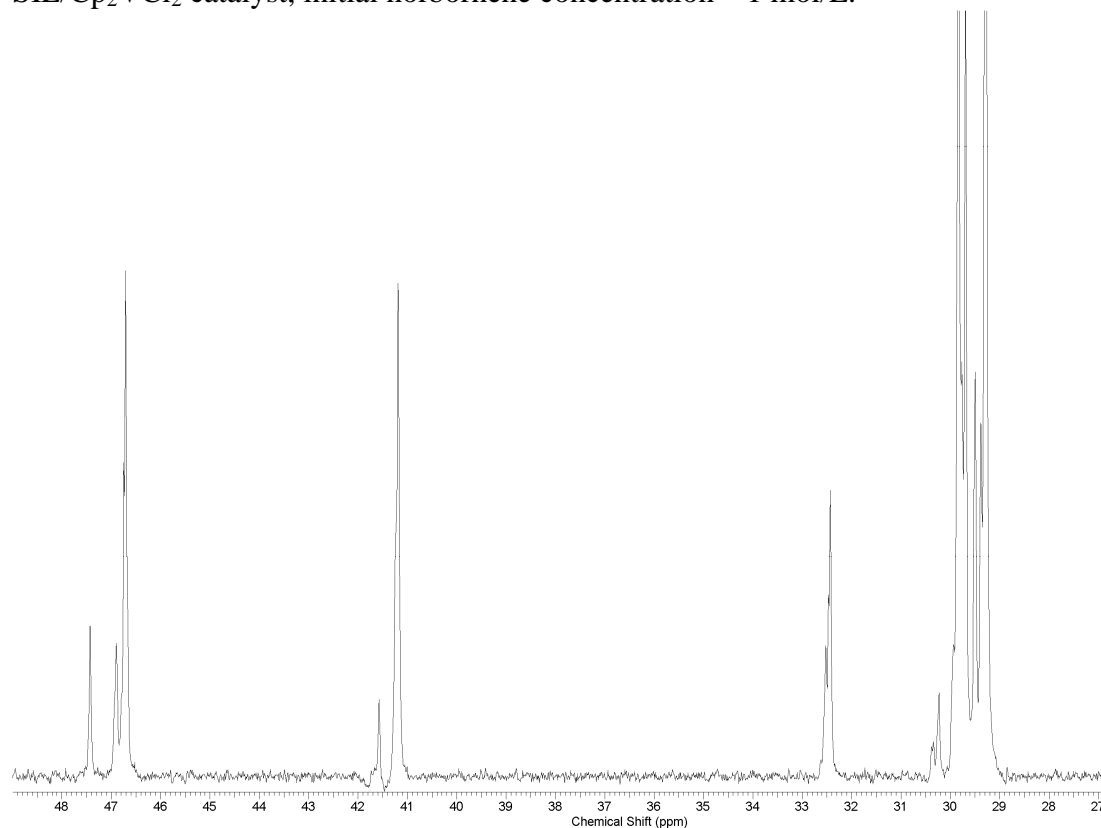

reaction time – 10 min.

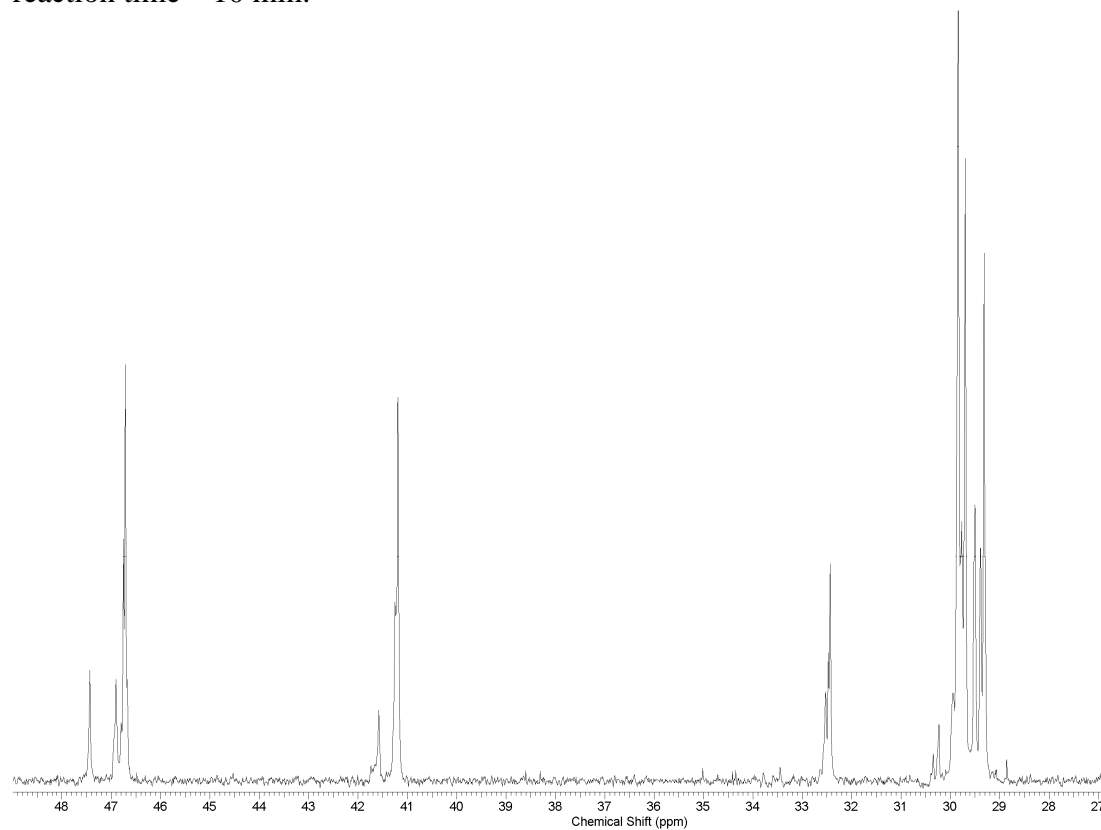

reaction time – 60 min.

**Fig. 3S**  $^{13}\text{C}$  NMR spectra of the ethylene/norbornene copolymer obtained using the homogeneous  $\text{Cp}_2\text{VCl}_2$  catalyst, initial norbornene concentration – 1 mol/L.

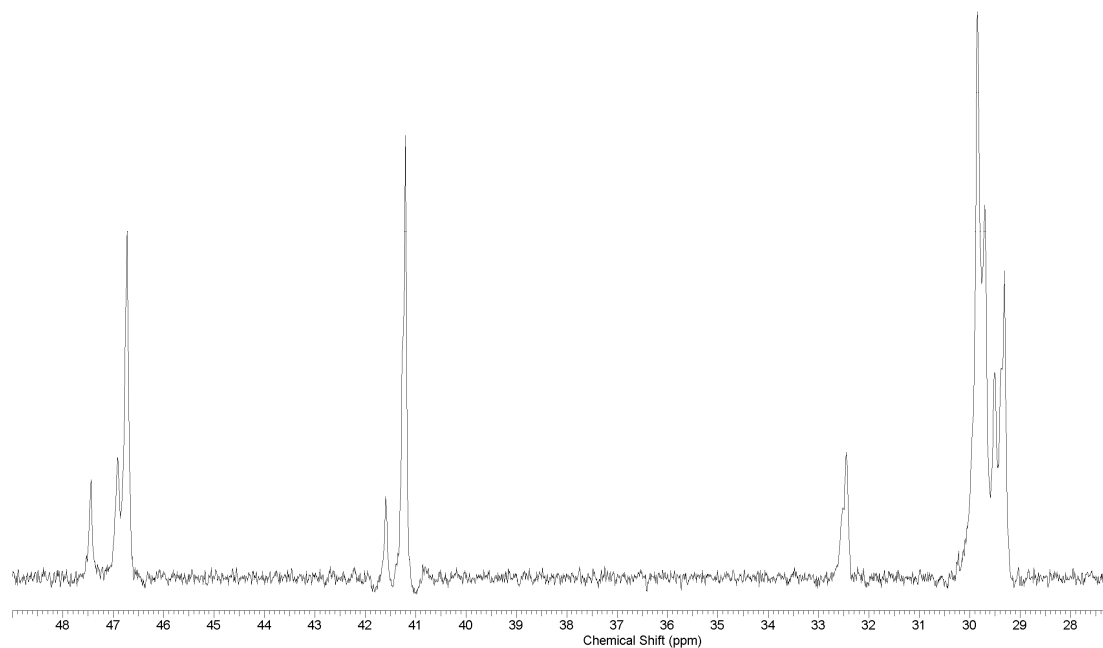

reaction time – 10 min.

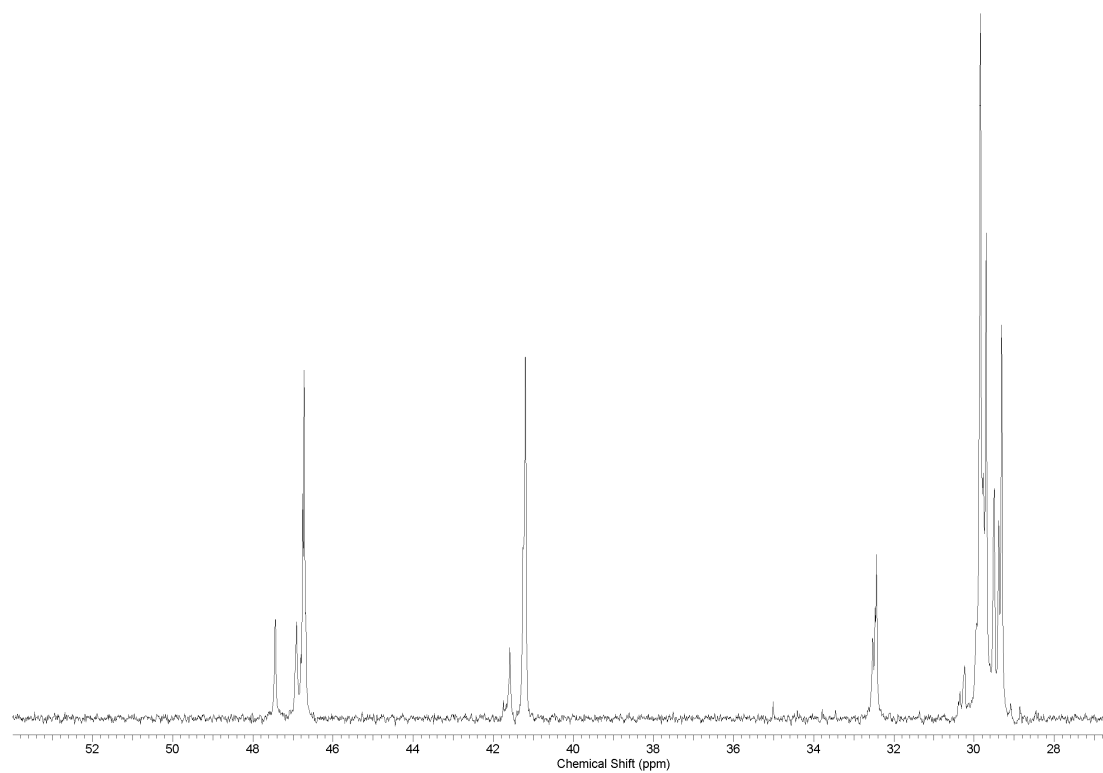

reaction time – 60 min.

**Fig. 4S**  $^{13}\text{C}$  NMR spectra of the ethylene/1-octene copolymer obtained using the SIL/ $\text{Cp}_2\text{VCl}_2$  catalyst, initial 1-octene concentration – 1 mol/L.

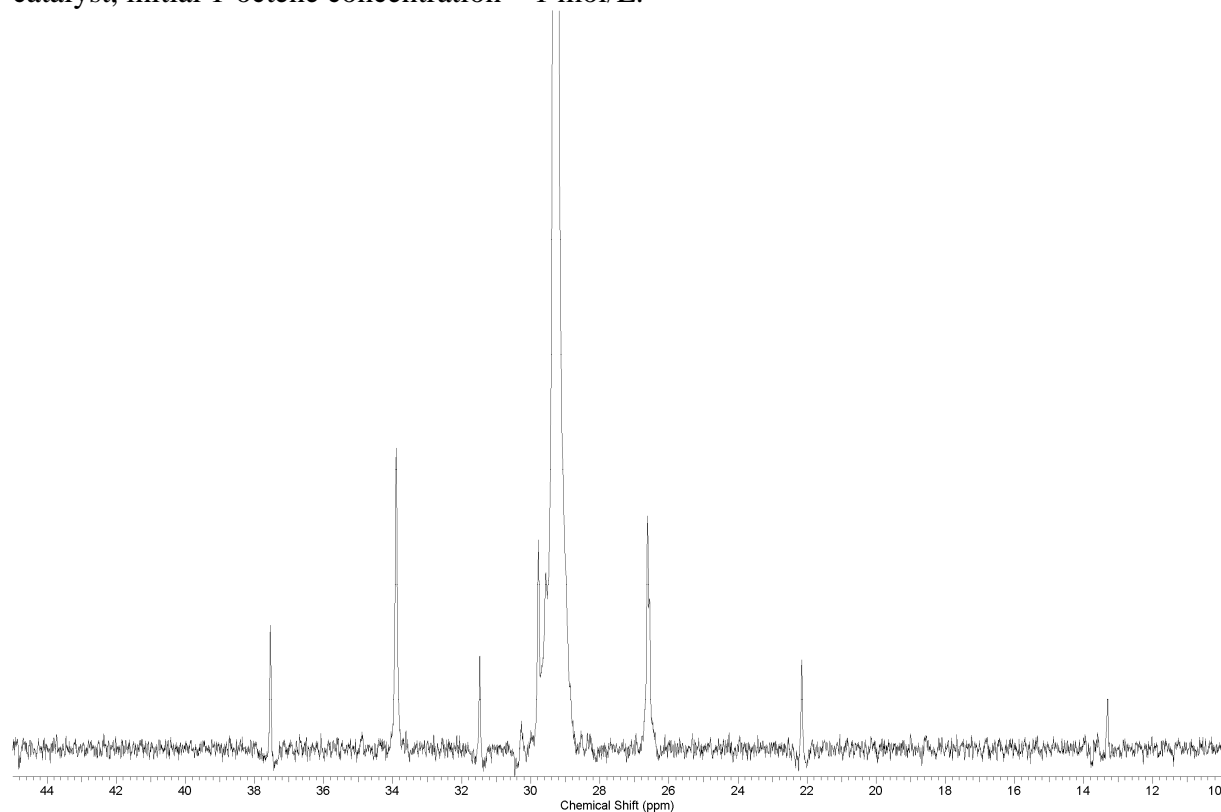

reaction time – 10 min.

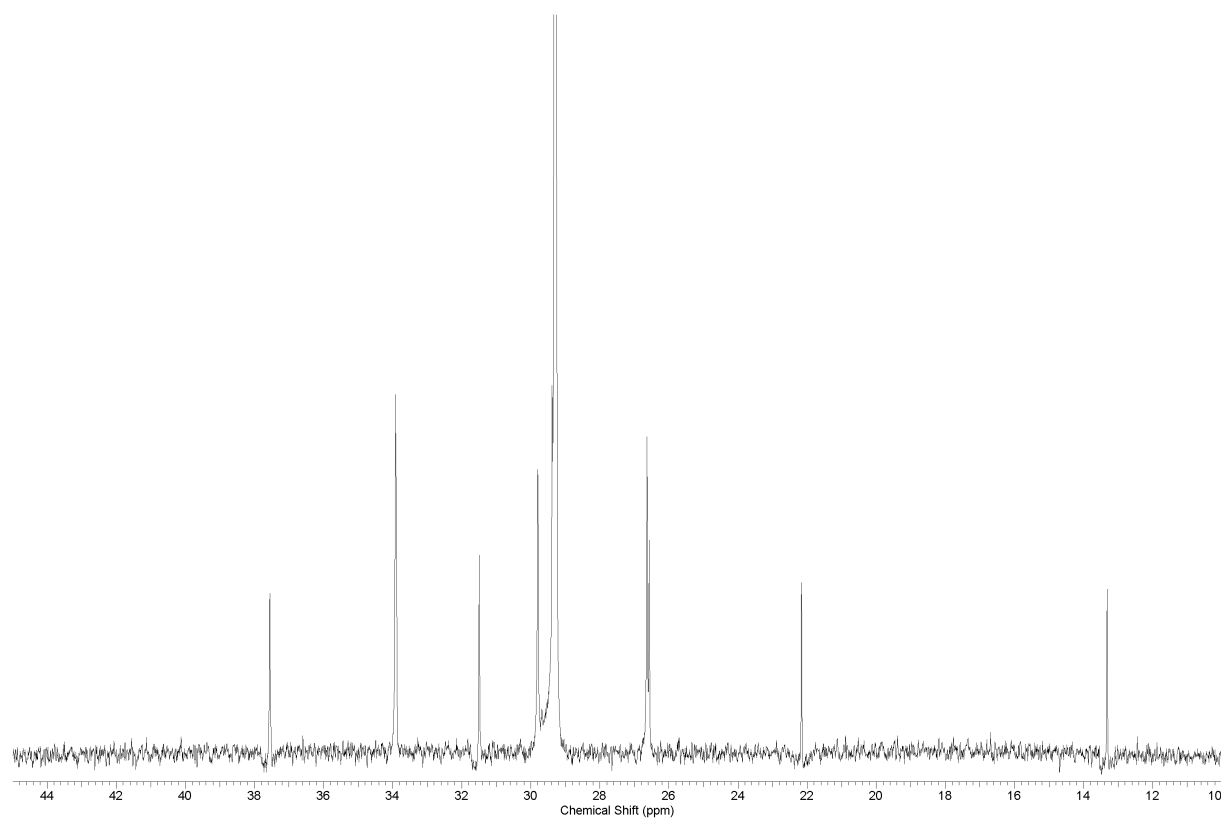

reaction time – 60 min.
